# Supplementary material
Source: publisher figshare collection journal article supplement (https://acs.figshare.com/ndownloader/files/4170037)
Supplement: Supplementary file 1 [file 4170037]

## **A Highly Sensitive, Dual-Readout Assay Based on Gold Nanoparticles for Organophosphorus and Carbamate Pesticides**

*Dingbin Liu<sup>1,3 †</sup>, Wenwen Chen<sup>1,3†</sup>, Jinhua Wei<sup>2,3</sup>, Xuebing Li<sup>2</sup>, Zhuo Wang<sup>1\*</sup>, and Xingyu Jiang<sup>1\*</sup>*

*1. CAS Key Lab for Biological Effects of Nanomaterials and Nanosafety, National Center for Nanoscience and Technology, 11 Beiyitiao, Zhongguancun, Beijing, 100190 (China)*

*2. Institute of Microbiology, Chinese Academy of Science, No.8 North 2nd Street, Haidian District, Beijing, 100190 (China)*

*3. Graduate University of Chinese Academy of Sciences, Shijingshan, Yuquan Road, 19(A), Beijing, 100049 (China)*

\* To whom correspondence should be addressed.

† These authors contributed equally to this work.

E-mail: xingyujiang@nanoctr.cn; wangz@nanoctr.cn

Fax: (+86)10-82545631

Phone: (+86)10-82545611

## Figures:

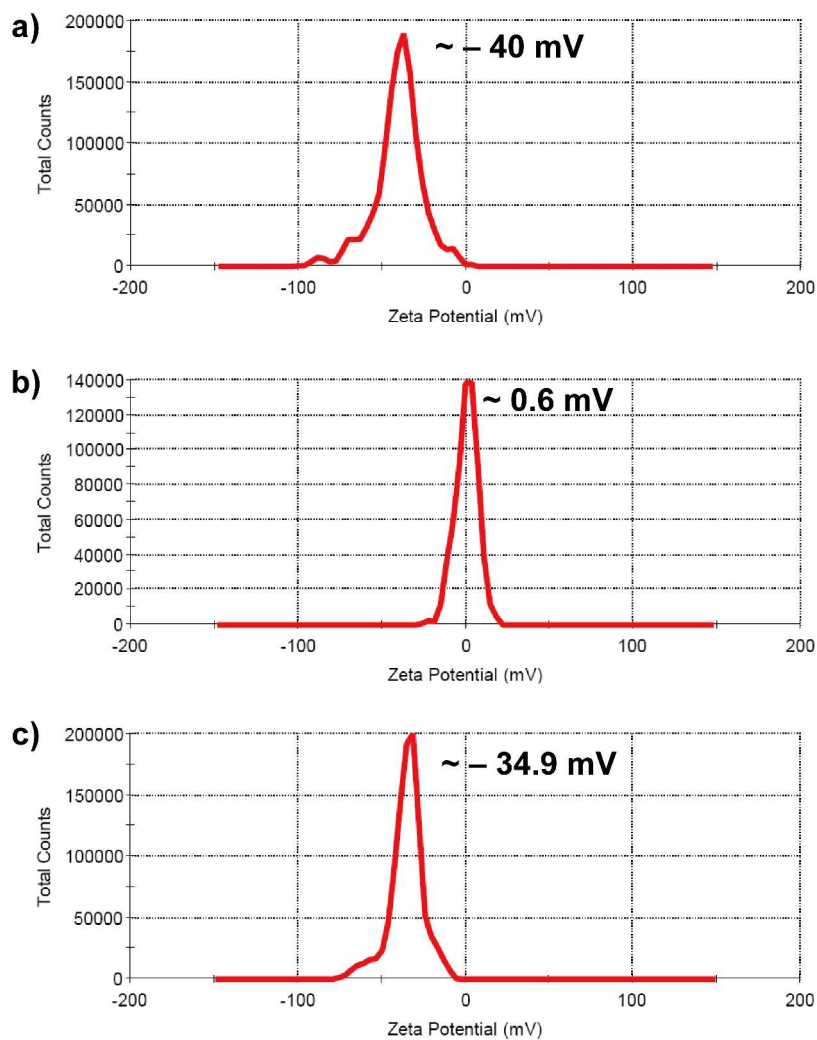

**Figure S1.** Zeta Potential Measurement of RB-AuNPs solutions before a) and after b) adding AChE and ATC, and c) that of RB-AuNPs solution containing AChE which was pretreated with Carbaryl (100 µg/L) and ATC was added finally. The concentration of AChE was set to be 1 U/mL, and that of ATC was 20 µM.

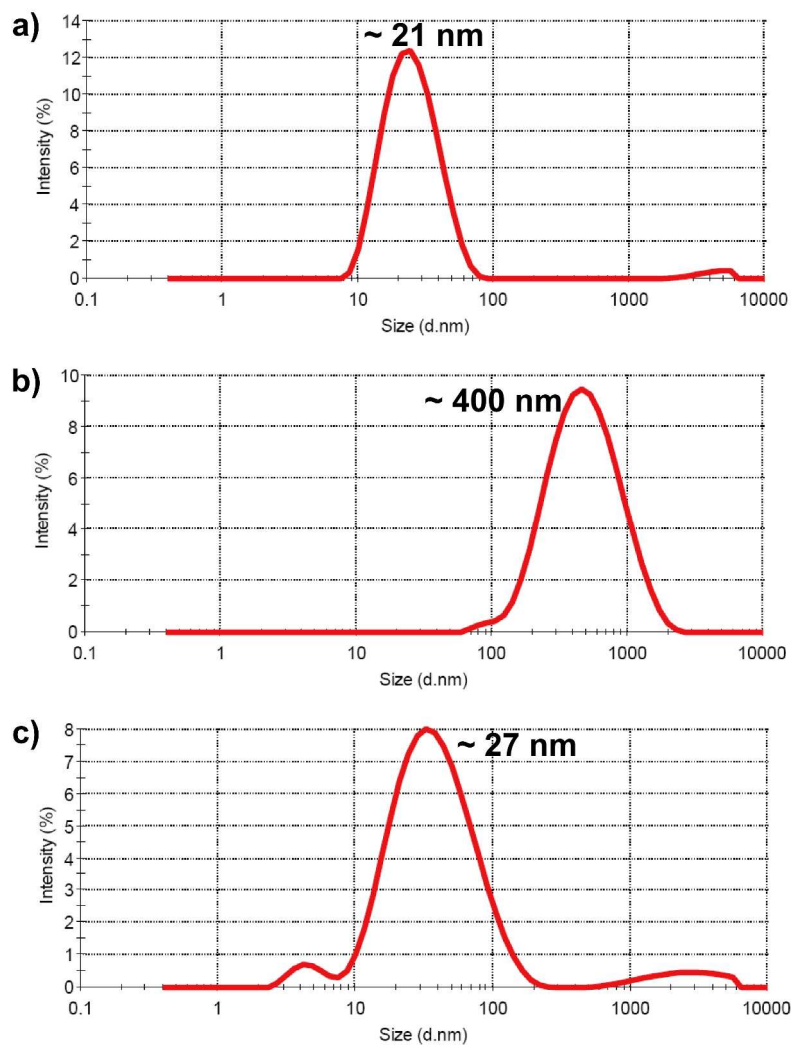

**Figure S2.** DLS measurements of RB-AuNPs solutions before a) and after b) adding AChE and ATC, and c) that of RB-AuNPs solution containing AChE which was pretreated with Carbaryl (100  $\mu\text{g/L}$ ) and ATC was added finally. The concentraion of AChE was set to be 1 U/mL, and that of ATC was 20  $\mu\text{M}$ .

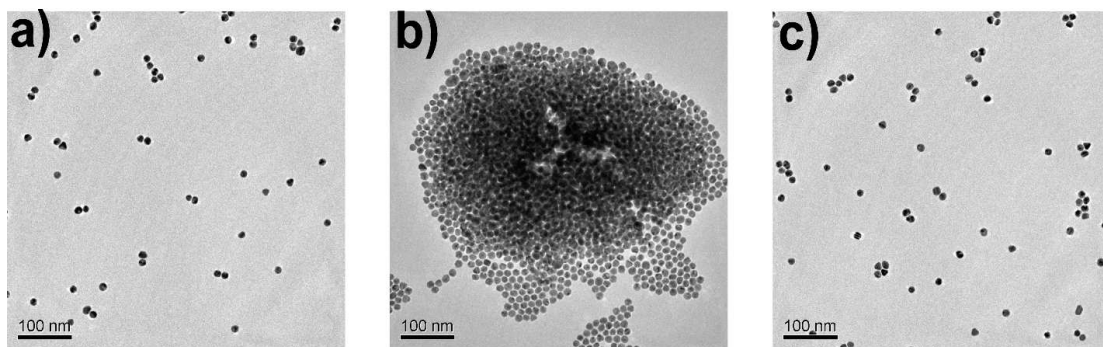

**Figure S3.** TEM images confirmed the variations of aggregation states of RB-AuNPs. a) Well-dispersed RB-AuNPs. b) The RB-AuNPs aggregates were formed after adding AChE and ATC. c) The formation of RB-AuNPs aggregates was prevented by pretreating AChE with Carbaryl (100  $\mu\text{g/L}$ ).

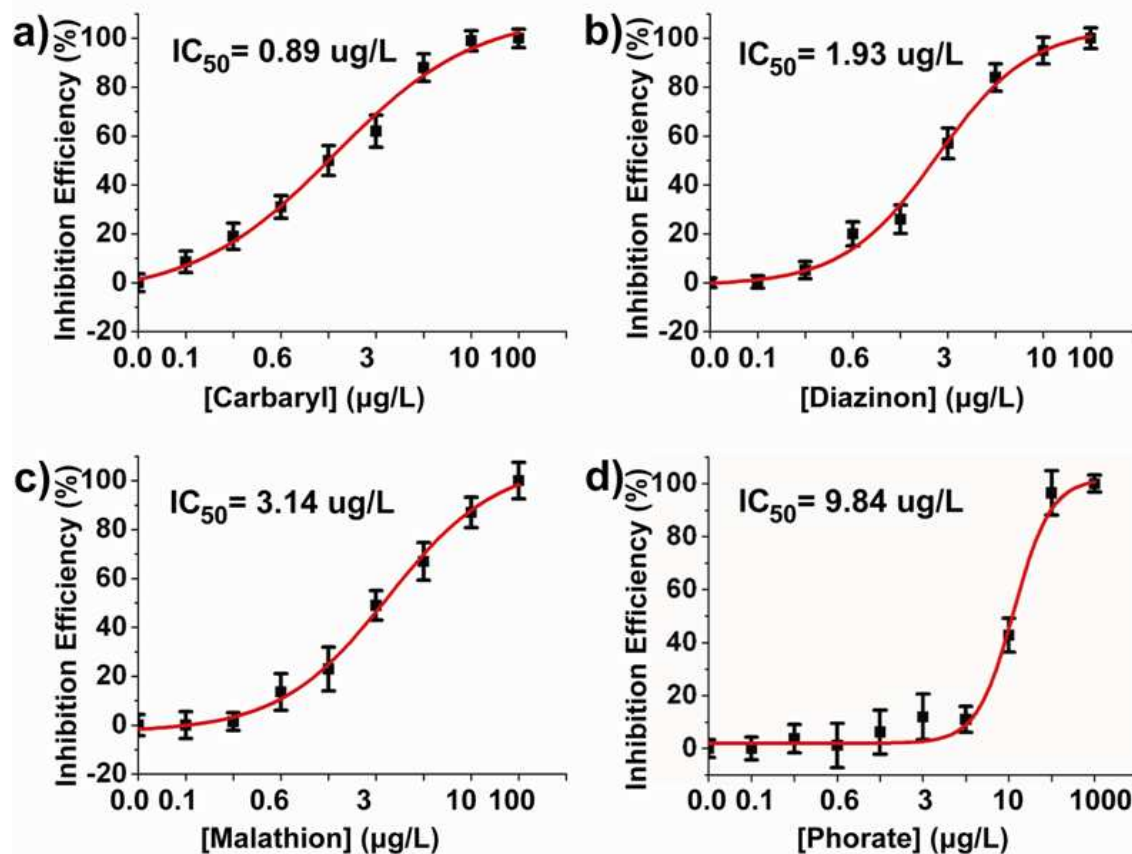

**Figure S4.** The inhibition efficiencies of different AChE inhibitors versus their concentrations. a) Carbaryl, b) Diazinon, c) Malathion, d) Phorate. The standard deviations of the samples were calculated by a sample size of 6.

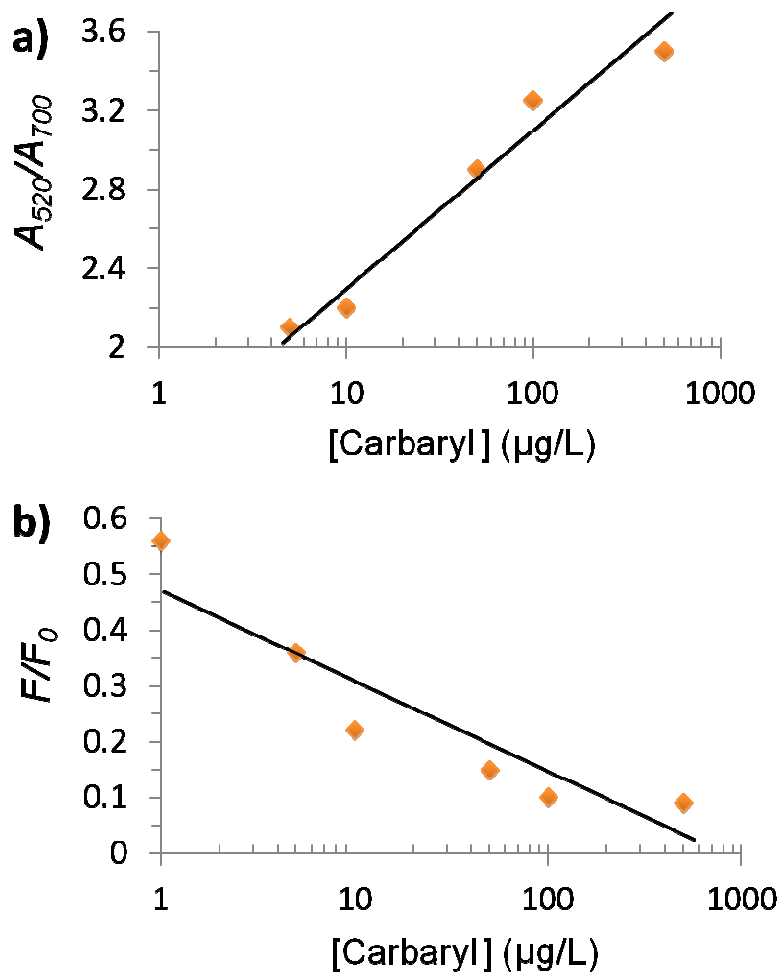

Figure S5. Dependence of  $A_{520}/A_{700}$  values (a) and their corresponding  $F/F_0$  values (b) on various concentrations of sprayed Carbaryl residues in the mixture of tomatoes and cucumbers samples.

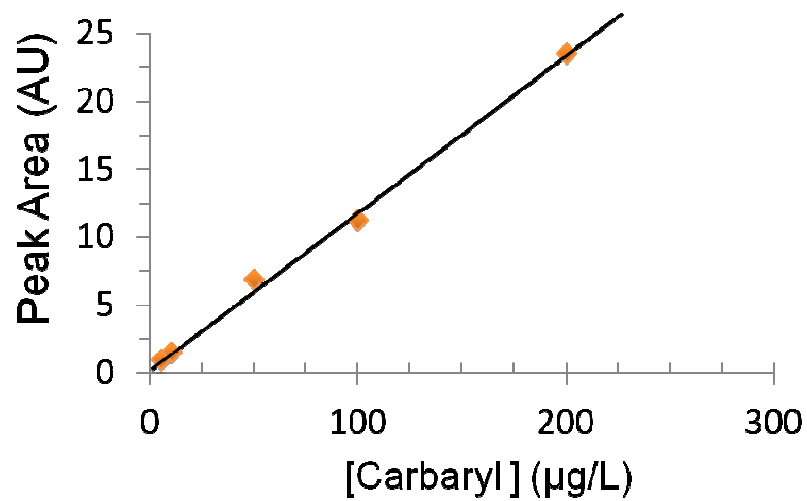

Figure S6. HPLC analysis-calibrated standard curve of the sprayed Carbaryl residues in the mixture of tomatoes and cucumbers samples.
